# Supplementary material for: The Human TUT1 Nucleotidyl Transferase as a Global Regulator of microRNA Abundance
Source: PLoS One. 2013 Jul 18;8(7):e69630. doi: 10.1371/journal.pone.0069630 (PMC3715485; doi:10.1371/journal.pone.0069630)
Supplement: Table S2 — Table of miRNA primary transcript assays from Applied Biosystems. (XLS) [file pone.0069630.s004.xls]

## Sheet: Sheet1
microRNA	ABI Assay ID
pri-let-7d	Hs03302562_pri
pri-miR-1-1	Hs03303345_pri
pri-miR-100	Hs03302731_pri
pri-miR-101-2	Hs03303387_pri
pri-miR-103a-2	Hs03302758_pri
pri-miR-125b-1	Hs03303095_pri
pri-miR-125b-2	Hs03303224_pri
pri-miR-135a-2	Hs03303133_pri
pri-miR-139	Hs03302845_pri
pri-miR-143	Hs03303166_pri
pri-miR-149	Hs03303264_pri
pri-miR-151b	Hs03303589_pri
pri-miR-152	Hs03303177_pri
pri-miR-15b	Hs03294999_pri
pri-miR-16	Hs03303046_pri
pri-miR-181c	Hs03303907_pri
pri-miR-183	Hs03302720_pri
pri-miR-185	Hs03303287_pri
pri-miR-186	Hs03303293_pri
pri-miR-194-1	Hs03303313_pri
pri-miR-195	Hs03303320_pri
pri-miR-19a	Hs03295901_pri
pri-miR-200c	Hs03303157_pri
pri-miR-21	Hs03302625_pri
pri-miR-210	Hs03302948_pri
pri-miR-211	Hs03302954_pri
pri-miR-216a	Hs03302972_pri
pri-miR-218-1	Hs03302986_pri
pri-miR-218-2	Hs03302992_pri
pri-miR-221	Hs03303007_pri
pri-miR-223	Hs03303017_pri
pri-miR-26a-1	Hs03293444_pri
pri-miR-26a-2	Hs03303430_pri
pri-miR-2964a	Hs03303392_pri
pri-miR-29b-1	Hs03302748_pri
pri-miR-29b-2	Hs03302750_pri
pri-miR-301a	Hs03303409_pri
pri-miR-302c	Hs03303460_pri
pri-miR-30a	Hs03302677_pri
pri-miR-3154	Hs04227284_pri
pri-miR-32	Hs03302686_pri
pri-miR-320a	Hs03303331_pri
pri-miR-325	Hs03303656_pri
pri-miR-334	Hs03293725_pri
pri-miR-346	Hs03303669_pri
pri-miR-34a	Hs03302884_pri
pri-miR-3591	Hs03303072_pri
pri-miR-375	Hs03303515_pri
pri-miR-378a	Hs03303536_pri
pri-miR-383	Hs03303566_pri
pri-miR-429	Hs03303727_pri
pri-miR-449b	Hs03304853_pri
pri-miR-493	Hs03293825_pri
pri-miR-505	Hs03304171_pri
pri-miR-509-2	Hs03295863_pri
pri-miR-518f	Hs04227599_pri
pri-miR-550a-1	Hs03295588_pri
pri-miR-5584	Hs03303371_pri
pri-miR-5591	Hs03304375_pri
pri-miR-576	Hs03304382_pri
pri-miR-582	Hs03304420_pri
pri-miR-602	Hs03304559_pri
pri-miR-623	Hs03304677_pri
pri-miR-628	Hs03304697_pri
pri-miR-637	Hs03295635_pri
pri-miR-642b	Hs03294230_pri
pri-miR-662	Hs03304838_pri
pri-miR-671	Hs03295679_pri
pri-miR-7-1	Hs03302860_pri
pri-miR-7-3	Hs03302872_pri
pri-miR-9-1	Hs03303201_pri
pri-miR-9-3	Hs03293595_pri
pri-miR-933	Hs03305252_pri
